## Comparison of the Effect of Etomidate and Desflurane on Brain Tissue Gases and pH during Prolonged Middle Cerebral Artery Occlusion

William E. Hoffman, Ph.D.,\* Fady T. Charbel, M.D.,† Guy Edelman, M.D.,‡ Mukesh Misra, M.D.,§ James I. Ausman, M.D., Ph.D.||

**Background:** The authors compared the effects of etomidate and desflurane on brain tissue oxygen pressure ( $P_{O_2}$ ), carbon dioxide pressure ( $P_{CO_2}$ ), and pH in patients who had middle cerebral artery occlusion for >15 min.

**Methods:** After a craniotomy, a probe that measures  $P_{O_2}$ ,  $P_{CO_2}$ , and pH was inserted into cortical tissue at risk for ischemia during middle cerebral artery occlusion. A burst suppression pattern of the electroencephalogram was induced with etomidate (n = 6) or 9% end-tidal desflurane (n = 6) started before middle cerebral artery occlusion. Mean blood pressure was supported with phenylephrine to 90–95 mmHg.

**Results:** During baseline conditions, tissue  $P_{O_2}$ ,  $P_{CO_2}$ , and pH were similar between the two groups ( $P_{O_2}$  = 15 mmHg,  $P_{CO_2}$  = 60 mmHg, pH = 7.1). During administration of etomidate before middle cerebral artery occlusion, tissue  $P_{O_2}$  decreased in five of six patients without a change in  $P_{CO_2}$  or pH. During administration of 9% desflurane, tissue  $P_{O_2}$  and pH increased before middle cerebral artery clipping. Middle cerebral artery occlusion for an average of 33 min with etomidate and 37 min with desflurane produced a decrease in pH with etomidate (7.09 to 6.63,  $P < 0.05$ ) but not with desflurane (7.12 to 7.15).

**Conclusion:** These results suggest that tissue hypoxia and acidosis are often observed during etomidate treatment and middle cerebral artery occlusion. Treatment with desflurane significantly increases tissue  $P_{O_2}$  alone and attenuates acidotic changes to prolonged middle cerebral artery occlusion. (Key words: Anesthesia; anesthetics; intravenous; ischemia; neuroanesthesia; volatile.)

\* Associate Professor, Department of Anesthesiology.

† Assistant Professor, Department of Neurosurgery.

‡ Assistant Professor, Department of Anesthesiology.

§ Resident, Department of Neurosurgery.

|| Professor and Chairman, Department of Neurosurgery.

Received from the Departments of Anesthesiology and Neurosurgery, University of Illinois at Chicago, Chicago, Illinois. Submitted for publication July 30, 1997. Accepted for publication December 30, 1997.

Address reprint requests to Dr. Hoffman: Anesthesiology Department, Suite 3200, University of Illinois Hospital, MC 515, 1740 West Taylor, Chicago, Illinois 60612. Address electronic mail to: Whoffman@uic.edu

TEMPORARY brain artery occlusion may be required to facilitate cerebrovascular surgery and to decrease the risk of bleeding. This carries a risk of ischemic brain injury and infarction if occlusion times are prolonged. Treatment with etomidate before brain artery occlusion may allow an occlusion time of 14 min with a good recovery.<sup>1</sup> This is consistent with the hypothesis that anesthetic agents that suppress brain electrical activity decrease brain metabolic demand and attenuate ischemic injury.<sup>2</sup> Recent studies in rats suggest, however, that treatment with etomidate produces greater ischemic injury compared with thiopental or halothane.<sup>3,4</sup> Inhalation anesthetic agents, including isoflurane and desflurane, can suppress brain electrical activity, produce cerebrovasodilation, and enhance brain tissue oxygenation in animal and human studies.<sup>5-9</sup> This raises the possibility that an anesthetic agent such as desflurane may attenuate ischemic changes during prolonged periods of brain artery occlusion by decreasing metabolic demand and enhancing tissue perfusion. The purpose of this study was to compare the effects of etomidate and desflurane on brain tissue oxygen pressure ( $P_{O_2}$ ), brain tissue carbon dioxide pressure ( $P_{CO_2}$ ), and pH changes in patients with middle cerebral artery (MCA) occlusion longer than 15 min.

### Methods

The clinical review board at our institution approved this study. Patients gave informed consent for brain tissue monitoring and randomization of anesthetic treatment. Before the start of surgery, patients were randomly selected to receive either etomidate or desflurane to produce suppression of electroencephalogram. Eleven patients were scheduled for an extracerebral artery to intracerebral artery bypass. Nine of these patients had a superficial temporal artery-to-MCA bypass, and two patients had a carotid artery-to-MCA bypass



## BRAIN TISSUE OXYGENATION

**Table 1. Baseline Arterial Gases and pH, Clip Time, Hypoxia Time, Acidosis Time, and Outcome**

| Patient No.       | Age (yr)/<br>Sex | Surgery  | MAP<br>(mmHg) | Pa <sub>O<sub>2</sub></sub><br>(mmHg) | Pa <sub>CO<sub>2</sub></sub><br>(mmHg) | pH <sub>a</sub> | Brain<br>Temperature<br>(°C) | Clip<br>(min) | Hypoxia<br>(min) | Acidosis<br>(min) |
|-------------------|------------------|----------|---------------|---------------------------------------|----------------------------------------|-----------------|------------------------------|---------------|------------------|-------------------|
| <b>Etomidate</b>  |                  |          |               |                                       |                                        |                 |                              |               |                  |                   |
| 1                 | 40/F             | STA-MCA  | 96            | 218                                   | 32                                     | 7.43            | 34.0                         | 38            | 35               | NA                |
| 2                 | 50/F             | Car-MCA  | 76            | 319                                   | 33                                     | 7.39            | 35.3                         | 32            | 0                | 0                 |
| 3                 | 52/M             | STA-MCA  | 112           | 97                                    | 44                                     | 7.34            | 35.6                         | 50            | 50               | 50                |
| 4                 | 45/F             | STA-MCA  | 85            | 193                                   | 33                                     | 7.46            | 35.1                         | 18            | 18               | 12                |
| 5                 | 52/M             | STA-MCA  | 105           | 103                                   | 40                                     | 7.43            | 34.9                         | 42            | 0                | 0                 |
| 6                 | 51/M             | STA-MCA  | 111           | 241                                   | 29                                     | 7.47            | 37.9                         | 22            | 21               | 21                |
| Mean ± SD         |                  |          | 97 ± 14       | 195 ± 84                              | 35 ± 5                                 | 7.42 ± 0.04     | 35.4 ± 1.3                   | 33 ± 12       | 30 ± 14          | 27 ± 13           |
| <b>Desflurane</b> |                  |          |               |                                       |                                        |                 |                              |               |                  |                   |
| 1                 | 71/F             | STA-MCA  | 88            | 131                                   | 38                                     | 7.36            | 35.1                         | 34            | 0                | 0                 |
| 2                 | 40/M             | STA-MCA  | 81            | 154                                   | 33                                     | 7.42            | 34.8                         | 37            | 0                | 0                 |
| 3                 | 31/F             | Car-MCA  | 92            | 167                                   | 41                                     | 7.36            | 36.5                         | 38            | 37               | 0                 |
| 4                 | 51/M             | STA-MCA  | 86            | 222                                   | 38                                     | 7.44            | 36.0                         | 39            | 0                | 0                 |
| 5                 | 64/M             | STA-MCA  | 89            | 130                                   | 39                                     | 7.33            | 34.8                         | 51            | 0                | 0                 |
| 6                 | 47/F             | Aneurysm | 76            | 229                                   | 31                                     | 7.43            | 34.9                         | 24            | 22               | 0                 |
| Mean ± SD         |                  |          | 85 ± 5        | 172 ± 43                              | 36 ± 4                                 | 7.39 ± 0.04     | 35.3 ± 0.7                   | 37 ± 8        | 10 ± 15*         | 0*                |

STA = superficial temporal artery; MCA = middle cerebral artery; Car = carotid; NA = not available; MAP = mean arterial pressure; Pa<sub>CO<sub>2</sub></sub> = arterial CO<sub>2</sub> tension; Pa<sub>O<sub>2</sub></sub> = arterial oxygen tension; pH<sub>a</sub> = arterial pH.

\*  $P < 0.05$  versus etomidate.

using a vein graft, which required temporary occlusion of the MCA (table 1). Patient 2 in the etomidate group had a superficial temporal artery-to-MCA bypass when the internal carotid artery was removed during excision of a left sphenoid meningioma. One patient (desflurane patient 6) had a giant MCA aneurysm, which had bled 6 days before surgery. All other patients had a presurgical diagnosis of cerebral occlusive disease. This was determined by neurologic symptoms of regional ischemia and confirmed by single-photon emission computed tomography scans and cerebral angiography.

Patients fasted overnight, and blood glucose was measured intermittently throughout the case and maintained at <200 mg/dl with insulin treatment if necessary. Anesthesia was induced with 3–5 mg/kg thiopental and 10–15 µg/kg fentanyl, and muscle paralysis was achieved with 100 µg/kg vecuronium for tracheal intubation. Patients in group 1 were ventilated with 0.5% isoflurane (n = 6) and in group 2 with 3% desflurane (n = 6) with a fraction of inspired carbon dioxide (F<sub>I<sub>O<sub>2</sub></sub>) of 0.4 and the balance nitrogen. A radial artery catheter was inserted for direct measurement of arterial pressure using a Marquette monitor (Milwaukee, WI) and for arterial blood gas samples. Arterial P<sub>CO<sub>2</sub></sub> was adjusted to 35–40 mmHg. End-tidal CO<sub>2</sub> and anesthetic gas concentration were monitored by a Datex Ultima (Helsinki, Finland). An esophageal temperature probe</sub>

was inserted, and temperature was allowed to decrease to 34°C during the surgical procedure. Two-channel bifrontal electroencephalography was performed from electrodes placed on the forehead over both hemispheres with the nasion as the reference using an A-1000 Electroencephalography monitor (Aspect, Natick, MA). During a burst suppression electroencephalogram pattern, this monitor indicates the percentage of the electroencephalographic signal that is quiescent.

The patient was placed supine in a park bench position with the head in pins and turned. After a pterional craniotomy and dural reflection, a Paratrend 7 probe (Diametrics Medical, Minneapolis, MN), which measures P<sub>O<sub>2</sub></sub>, P<sub>CO<sub>2</sub></sub>, pH, and temperature, was inserted by the neurosurgeon. The probe was always placed in the same region in the midfrontal gyrus, close to the frontal operculum. The probe is 0.5 mm in diameter and must be inserted 4 cm for all of the sensors to be in brain tissue.<sup>10</sup> The brain surface surrounding the tissue was covered with sterile gauze to prevent light contamination of the sensors. The P<sub>O<sub>2</sub></sub>, P<sub>CO<sub>2</sub></sub>, and pH sensors were calibrated using precision gases before insertion into the tissue, and a 30-min equilibration period was allowed after insertion before recording baseline values. Tissue gases and pH are reported with body temperature corrected to 37°C. Tissue hypoxia was defined as P<sub>O<sub>2</sub></sub> < 10 mmHg and acidosis as pH < 7.0 during the



time of MCA occlusion. A laser Doppler flow probe (Vasamedics, St. Paul, MN) was placed on the cortex surface adjacent to the Paratrend probe in three patients in the etomidate group and two patients in the desflurane group.

Before MCA occlusion, patients in group 1 ( $n = 6$ ) received etomidate as 0.1–0.15 mg/kg intravenous bolus doses to induce and maintain burst suppression electroencephalogram. Electroencephalographic quiescence of 50% was maintained. Isoflurane was continued during the treatment with etomidate. In group 2, end-tidal desflurane concentration was increased to 9% to produce the same burst suppression pattern.<sup>9</sup> Arterial blood pressure was maintained at baseline levels or higher in both groups with intravenous phenylephrine infusion during the period of burst suppression electroencephalogram. In both groups, MCA occlusion was produced 10–20 min after the start of burst suppression electroencephalogram. Arterial blood gas was measured at the start of recording, and all other variables, including blood pressure, electroencephalogram, end-tidal gases, and Paratrend measurements were recorded by computer every 10 s using a Labview program (National Instruments, Austin, TX).

Each patient was evaluated 3–5 days after surgery to determine if a new ischemic injury occurred. An ischemic injury was determined if the patient showed a new neurologic deficit that was confirmed by an infarct on the postoperative computed tomographic scan.

Statistics tests of normality and equal variance were performed initially on each data set to determine whether parametric or nonparametric analyses should be performed. Comparisons of treatments within each group were made by repeated-measures analysis of variance with Tukey's *post hoc* tests or a repeated-measures analysis of variance on ranks with Dunnett's tests used for *post hoc* comparison if the data were not parametric. Statistical comparisons of changes in  $P_{O_2}$ ,  $P_{CO_2}$ , and  $pH$  during MCA occlusion between etomidate and desflurane groups were made using *t* tests or a rank sum test. A Pearson product-moment correlation was used to evaluate the relation between temperature and the length of hypoxia or acidosis during MCA occlusion.

## Results

There was no difference in blood pressure, arterial blood gas levels, and  $pH$  or brain temperature between the etomidate and desflurane treatment groups during baseline conditions (table 1). A burst suppression elec-

troencephalogram was seen in all patients during treatment with etomidate or desflurane for brain protection with 50% electrical silence.

An example of tissue changes in patient 4 in the etomidate group is shown in figure 1. This patient showed a decrease in laser Doppler flow and  $P_{O_2}$  after treatment with etomidate alone. Middle cerebral artery occlusion further decreased flow and  $P_{O_2}$  and produced an increase in  $P_{CO_2}$  and a decrease in  $pH$  to 6.6 after 18 min of temporary clipping.

An example of patient 3 in the desflurane group is shown in figure 2. Treatment with 9% desflurane produced an immediate increase in laser Doppler flow,  $P_{O_2}$ , and  $pH$  and a decrease in  $P_{CO_2}$ . Middle cerebral artery occlusion decreased  $P_{O_2}$  to hypoxic levels but produced only modest, transient ischemic changes in  $P_{CO_2}$  and  $pH$ .

Treatment with etomidate produced a decrease in tissue  $P_{O_2}$  in five of six patients but no change in tissue  $P_{CO_2}$  or  $pH$  (fig. 3). During MCA occlusion, four of six patients had tissue hypoxia ( $P_{O_2} < 10$  mmHg) or acidosis ( $pH < 7.0$ ) for 12–50 min. Tissue  $P_{CO_2}$  and  $pH$  data were not available for patient 1 in the etomidate group because of inadequate light shielding. All four etomidate-treated patients who had extended periods of tissue hypoxia and acidosis during MCA occlusion had new neurologic deficits after surgery.

Elevating the concentration of desflurane from 3% to 9% increased tissue  $P_{O_2}$  and  $pH$  and decreased  $P_{CO_2}$  (fig. 4). Middle cerebral artery occlusion produced tissue hypoxia in two patients but not acidosis. The decrease in  $pH$  during MCA occlusion in patients treated with etomidate (median =  $-0.32$ ) was different from the small increase seen in desflurane-treated patients (median =  $0.05$ ,  $P < 0.05$ ). Changes in  $P_{O_2}$  and  $P_{CO_2}$  were not different between the two groups. There was no relation between the brain temperature at the time of MCA occlusion and the length of hypoxia or acidosis with both groups considered together. No desflurane-treated patient showed a new neurologic deficit.

## Discussion

These results are consistent with a previous report that the use of etomidate in the setting of cerebral ischemia may lead to a decrease in tissue  $P_{O_2}$ .<sup>11</sup> Ischemic changes were seen here in  $P_{CO_2}$  and  $pH$  in etomidate-treated patients during MCA occlusion, and a new ischemic injury was seen in these patients. This agrees with the work of Samson *et al.*,<sup>1</sup> who reported that even when etomi-



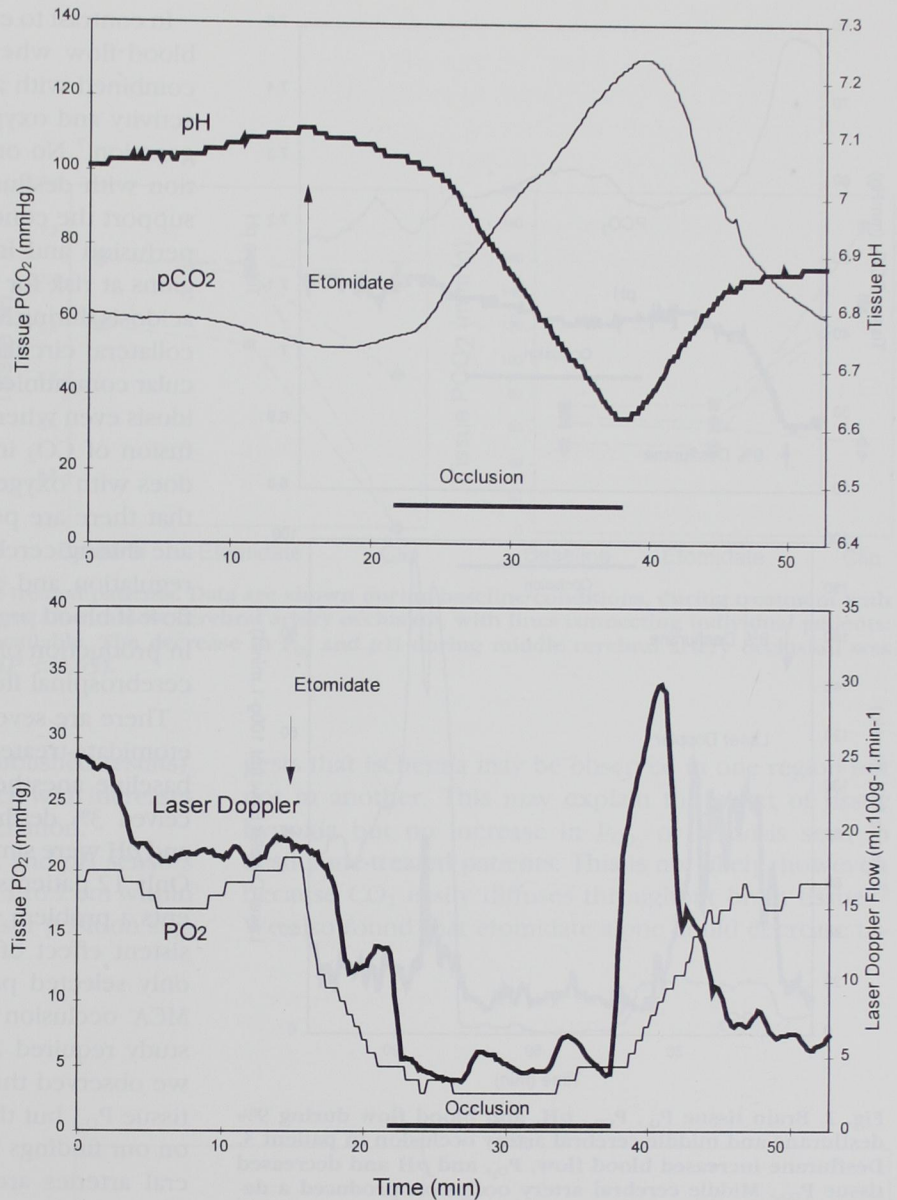

Fig. 1. Brain tissue  $P_{O_2}$ ,  $P_{CO_2}$ , pH, and blood flow during etomidate and middle cerebral artery occlusion in patient 4. Each tracing is identified in the graph. Laser Doppler flow and pH are shown with bold lines. At the time of treatment with etomidate,  $P_{O_2}$  and blood flow decreased without a change in pH or  $P_{CO_2}$ . Middle cerebral artery occlusion produced a further decrease in  $P_{O_2}$  and blood flow and an increase in  $P_{CO_2}$  and acidosis. This patient showed a severe neurologic deficit postoperatively.

date is used, lengths of brain artery occlusion >14 min produced a high incidence of ischemic injury and a 100% infarction rate with durations of occlusion >30 min. In contrast to etomidate, 9% desflurane increased  $P_{O_2}$  and pH in this study, and MCA occlusion produced hypoxia but no acidosis. Because both etomidate and desflurane may have decreased brain electrical activity and metabolic demand, we believe the contrast between changes in tissue gases and pH with each agent may be due to differences in tissue perfusion.

It has been reported that etomidate suppresses elec-

troencephalographic activity, decreases cerebral oxygen demand, and attenuates neuronal injury during ischemia.<sup>12-17</sup> Other reports, however, have questioned the ability of etomidate to protect the brain from ischemia, particularly when high doses are used that produce electroencephalographic quiescence but also can produce hemolysis.<sup>3,4,18-20</sup> Drummond *et al.*<sup>4</sup> speculated that etomidate may increase ischemia by decreasing release of nitric oxide and attenuating collateral blood flow. Etomidate may produce this effect by inhibition of nitric oxide synthesis or by nitric oxide binding by



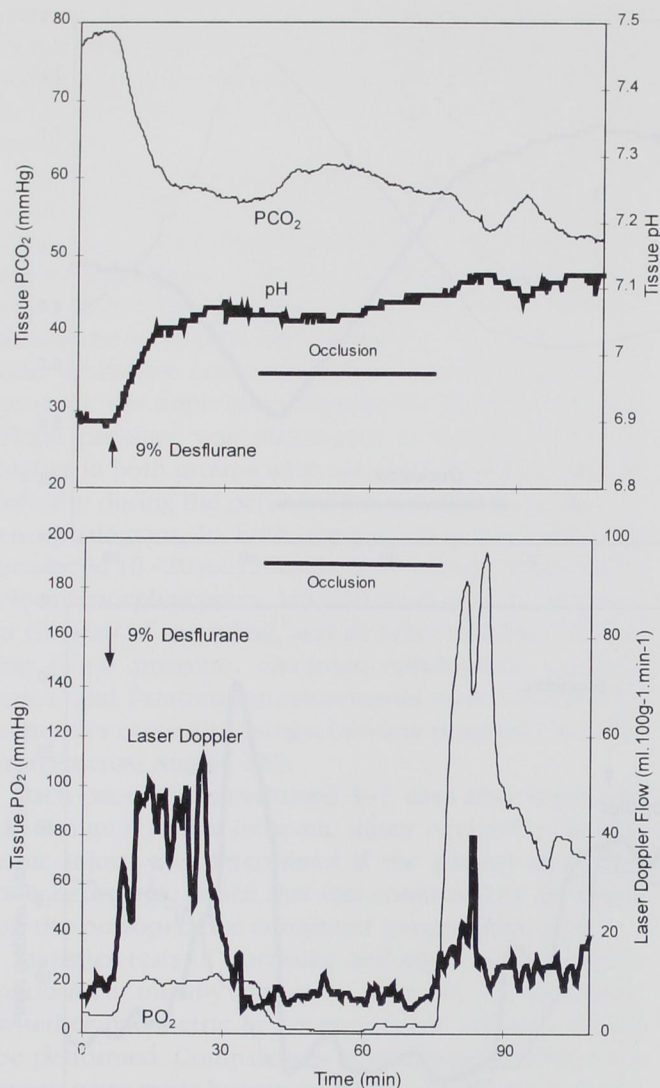

**Fig. 2.** Brain tissue  $P_{O_2}$ ,  $P_{CO_2}$ ,  $pH$ , and blood flow during 9% desflurane and middle cerebral artery occlusion in patient 3. Desflurane increased blood flow,  $P_{O_2}$ , and  $pH$  and decreased tissue  $P_{CO_2}$ . Middle cerebral artery occlusion produced a decrease in tissue  $P_{O_2}$  without a change in  $pH$  or  $P_{CO_2}$ . This patient had a good recovery.

free hemoglobin. This was supported by a more recent study in rats showing that treatments that enhance nitric oxide attenuate ischemic injury associated with etomidate.<sup>3</sup> Milde *et al.*<sup>12</sup> reported that sagittal sinus oxygen saturation decreases with etomidate treatment because of decreases in cerebral blood flow. Although our results and those of others indicate that the cerebrovasoconstrictor effects of etomidate do not produce ischemic changes alone,<sup>21,22</sup> tissue oxygenation may be decreased.<sup>11,12</sup>

In contrast to etomidate, desflurane increases cerebral blood flow when blood pressure is supported.<sup>5</sup> This, combined with a decrease in electroencephalographic activity and oxygen demand, may improve tissue oxygenation.<sup>7</sup> No one has examined the ischemic protection with desflurane in animals, however. Our results support the conclusion that desflurane enhances tissue perfusion and improves tissue metabolic status in regions at risk for ischemia. The attenuation of ischemic acidosis during MCA occlusion may be due to enhanced collateral circulation mediated by leptomeningeal vascular communications.  $CO_2$  clearance may attenuate acidosis even when oxygenation is decreased because diffusion of  $CO_2$  in tissue proceeds more readily than it does with oxygen.<sup>23</sup> It should also be noted, however, that there are potential disadvantages of using desflurane during cerebral ischemia, including impaired autoregulation and a possible decrease in cerebral blood flow if blood pressure is not maintained,<sup>24,25</sup> an increase in production of cerebrospinal fluid, and an increase in cerebrospinal fluid pressure.<sup>26,27</sup>

There are several weaknesses in this study. First, the etomidate-treated group received 0.5% isoflurane for baseline anesthesia, whereas the desflurane group received 3% desflurane. The baseline levels of  $P_{O_2}$ ,  $P_{CO_2}$ , and  $pH$  were similar between the two groups, however. Only 12 patients were evaluated in this study; this presents a problem with statistical evaluation of the inconsistent effect of etomidate on tissue  $P_{O_2}$ . Because we only selected patients for this study who underwent MCA occlusion for >15 min, however, the current study required 2 yr to complete. In a previous study, we observed that treatment with etomidate decreased tissue  $P_{O_2}$ , but this effect was also inconsistent.<sup>11</sup> Based on our findings here that patients with adequate collateral arteries are less likely to develop hypoxia with etomidate, we suggest that the variable effects of etomidate on  $P_{O_2}$  are related to the adequacy of collateral circulation.

It is possible that increases in tissue  $P_{O_2}$  may be due to changes in the concentration of desflurane rather than tissue  $P_{O_2}$ . We do not know if desflurane can change the current, and therefore the  $P_{O_2}$  measurement, by a direct action at the Clark electrode. Other measures of tissue metabolic status, including decreases in  $P_{CO_2}$  and increases in  $pH$  during desflurane, would be consistent with an increase in oxygenation. In addition, we have observed similar increases in tissue  $P_{O_2}$  with treatment with desflurane with a fiberoptic measure of tissue  $P_{O_2}$



## BRAIN TISSUE OXYGENATION

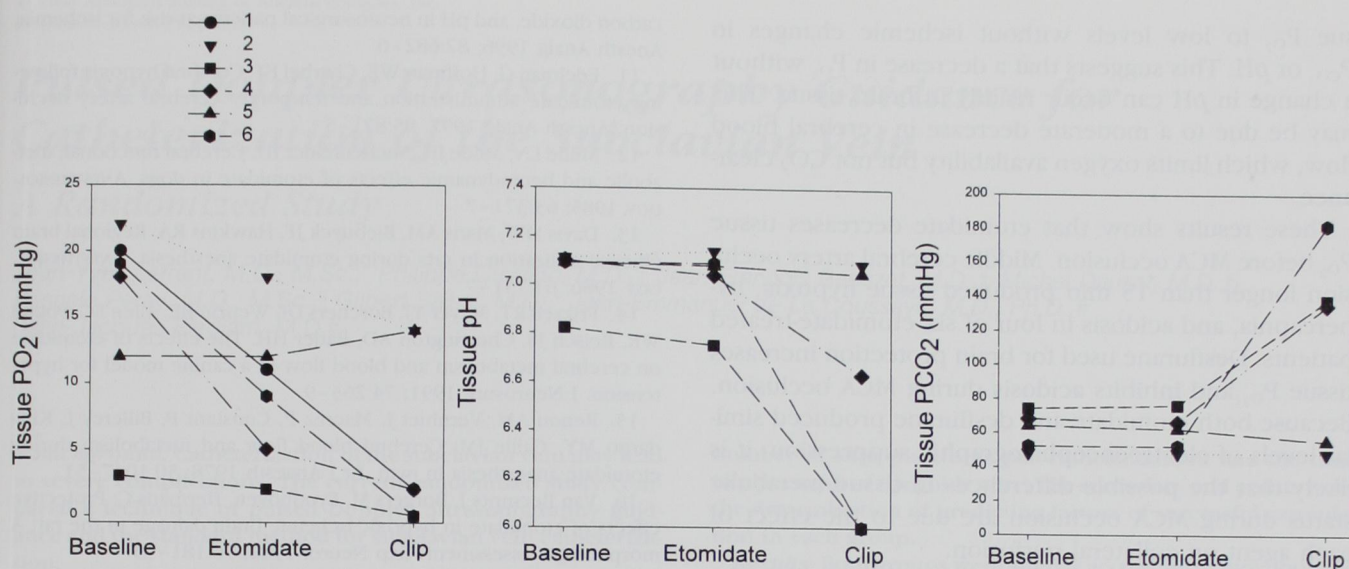

Fig. 3. Tissue  $P_{O_2}$ ,  $pH$ , and  $P_{CO_2}$  in etomidate-treated patients. Data are shown during baseline conditions, during treatment with etomidate, and for peak or minimum changes after middle cerebral artery occlusion, with lines connecting individual patients.  $P_{CO_2}$  and  $pH$  data for patient 1 were not available. The decrease in  $P_{O_2}$  and  $pH$  during middle cerebral artery occlusion was significant compared with baseline values ( $P < 0.05$ ).

rather than a Clark electrode (our unpublished results). This suggests that the elevation in  $P_{O_2}$  seen with increases in desflurane is due to enhanced oxygenation.

It should be noted that the  $P_{O_2}$ ,  $P_{CO_2}$ , and  $pH$  sensors of the Paratrend probe are separated by 1 to 2 cm within the tissue.<sup>10</sup> The spatial disparity in sensor position sug-

gests that ischemia may be observed in one region but not in another. This may explain the onset of tissue hypoxia but no increase in  $P_{CO_2}$  or acidosis seen in desflurane-treated patients. This is not likely, however, because  $CO_2$  easily diffuses throughout brain tissue.<sup>23</sup> We also found that etomidate alone could decrease tis-

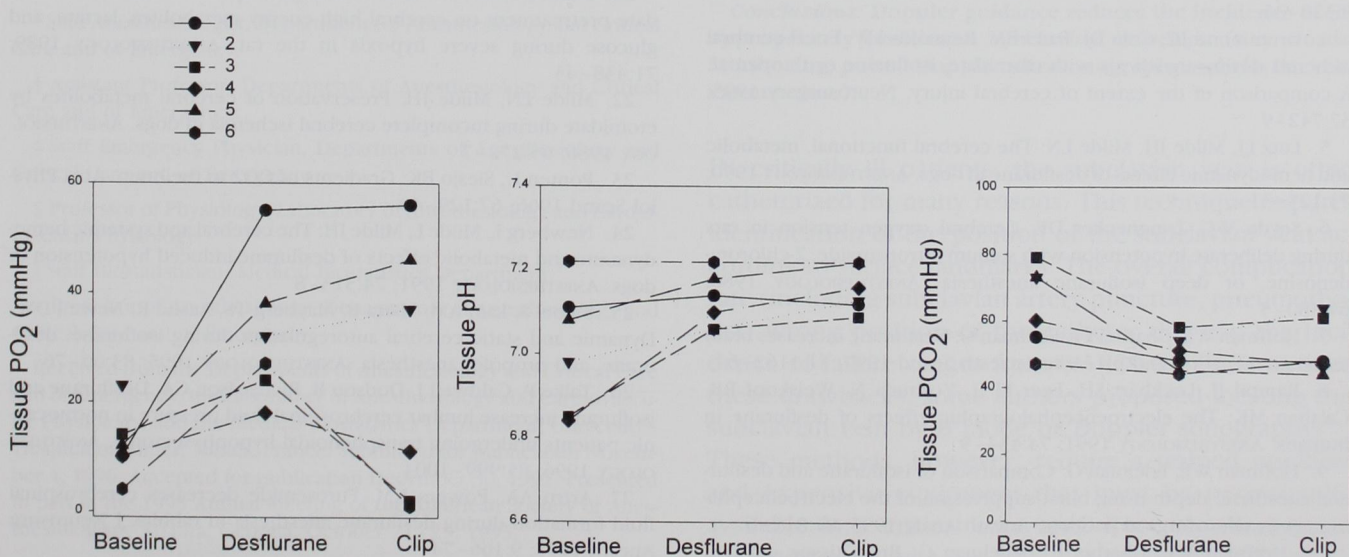

Fig. 4. Tissue  $P_{O_2}$ ,  $pH$ , and  $P_{CO_2}$  in desflurane-treated patients. Data are shown during baseline conditions, during treatment with desflurane, and for peak or minimum changes after middle cerebral artery occlusion, with lines connecting individual patients. Desflurane treatment increased  $P_{O_2}$  and  $pH$  and decreased  $P_{CO_2}$  ( $P < 0.05$ ). Middle cerebral artery occlusion produced no significant change in any parameter.



sue  $P_{O_2}$  to low levels without ischemic changes in  $P_{CO_2}$  or  $pH$ . This suggests that a decrease in  $P_{O_2}$  without a change in  $pH$  can occur readily in brain tissue. This may be due to a moderate decrease in cerebral blood flow, which limits oxygen availability but not  $CO_2$  clearance.

These results show that etomidate decreases tissue  $P_{O_2}$  before MCA occlusion. Middle cerebral artery occlusion longer than 15 min produced tissue hypoxia, hypercapnia, and acidosis in four of six etomidate-treated patients. Desflurane used for brain protection increases tissue  $P_{O_2}$  and inhibits acidosis during MCA occlusion. Because both etomidate and desflurane produced similar levels of electroencephalographic suppression, it is likely that the possible differences in tissue metabolic status during MCA occlusion are due to the effect of each agent on collateral perfusion.

## References

- Samson D, Batjer HH, Bowman G, Mootz L, Krippner WJ Jr, Meyer YJ, Allen BC: A clinical study of the parameters and effects of temporary arterial occlusion in the management of intracranial aneurysms. *Neurosurgery* 1994; 34:22-9
- Michenfelder JD: The interdependency of cerebral functional and metabolic effects following massive doses of thiopental in the dog. *ANESTHESIOLOGY* 1974; 40:575-80
- Cole DJ, Drummond JC, Patel PM, Jacobsen WK: Etomidate, nitric oxide, and cerebral ischemic injury. *J Neurosurg Anesth* 1996; 8:329-35
- Drummond JC, Cole DJ, Patel PM, Reynolds LW: Focal cerebral ischemia during anesthesia with etomidate, isoflurane or thiopental: A comparison of the extent of cerebral injury. *Neurosurgery* 1995; 37:742-9
- Lutz IJ, Milde JH, Milde LN: The cerebral functional, metabolic and hemodynamic effects of desflurane in dogs. *ANESTHESIOLOGY* 1990; 73:125-31
- Seyde WC, Longnecker DE: Cerebral oxygen tension in rats during deliberate hypotension with sodium nitroprusside, 2-chlororoadenosine, or deep isoflurane anesthesia. *ANESTHESIOLOGY* 1986; 64:480-5
- Hoffman WE, Charbel FT, Edelman G: Desflurane increases brain tissue oxygenation and pH. *Acta Anaesth Scand* 1997; 41:1162-6
- Rampil IJ, Lockhart SH, Eger EI II, Yoshuda N, Weiskopf RB, Calahan MK: The electroencephalographic effects of desflurane in humans. *ANESTHESIOLOGY* 1991; 74:434-9
- Hoffman WE, Edelman G: Comparison of isoflurane and desflurane anesthetic depth using burst suppression of the electroencephalogram in neurosurgical patients. *Anesth Analg* 1995; 81:811-6
- Hoffman WE, Charbel FT, Edelman G: Brain tissue oxygen, carbon dioxide, and pH in neurosurgical patients at risk for ischemia. *Anesth Analg* 1996; 82:682-6
- Edelman G, Hoffman WE, Charbel FT: Cerebral hypoxia following etomidate administration and temporary cerebral artery occlusion. *Anesth Analg* 1997; 85:821-5
- Milde LN, Milde JH, Michenfelder JD: Cerebral functional, metabolic and hemodynamic effects of etomidate in dogs. *ANESTHESIOLOGY* 1985; 63:371-7
- Davis DW, Mans AM, Biebuyck JF, Hawkins RA: Regional brain glucose utilization in rats during etomidate anesthesia. *ANESTHESIOLOGY* 1986; 64:751-7
- Frizzell RT, Meyer YJ, Borchers DJ, Weprin BE, Allen EC, Pogue WR, Reisch JS, Cherrington AD, Batjer HH: The effects of etomidate on cerebral metabolism and blood flow in a canine model for hypotension. *J Neurosurg* 1991; 74:263-9
- Renou AM, Vernhiet J, Macrez P, Constant P, Billerey J, Khadaroo MY, Caille JM: Cerebral blood flow and metabolism during etomidate anaesthesia in man. *Br J Anaesth* 1978; 50:1047-51
- Van Reempts J, Borgers M, Eyndhoven, Hermans C: Protective effects of etomidate in hypoxic-ischemic brain damage in the rat: A morphologic assessment. *Exp Neurol* 1982; 76:181-95
- Wauquier A, Ashton D, Clinke G, Niemegeers JE: Anti-hypoxic effects of etomidate, thiopental and methohexital. *Arch Int Pharmacodyn* 1981; 249:330-4
- Guo J, White JA, Batjer HH: Limited protective effects of etomidate during brainstem ischemia in dogs. *J Neurosurg* 1995; 82:278-83
- Sano T, Patel PM, Drummond JC, Cole DJ: A comparison of the cerebral protective effects of etomidate, thiopental, and isoflurane in a model of forebrain ischemia in the rat. *Anesth Analg* 1993; 76:990-7
- Watson JC, Drummond JC, Patel PM, Sano T, Akrawi W, Sang H: An assessment of the cerebral protective effects of etomidate in a model of incomplete forebrain ischemia in the rat. *Neurosurgery* 1992; 30:540-4
- Smith DS, Keykah MM, O'Neill JJ, Harp JR: The effect of etomidate pretreatment on cerebral high energy metabolites, lactate, and glucose during severe hypoxia in the rat. *ANESTHESIOLOGY* 1989; 71:438-43
- Milde LN, Milde JH: Preservation of cerebral metabolites by etomidate during incomplete cerebral ischemia in dogs. *ANESTHESIOLOGY* 1986; 65:272-7
- Ponten U, Siesjo BK: Gradients of  $CO_2$  in the brain. *Acta Physiol Scand* 1966; 67:129-40
- Newberg L, Milde L, Milde JH: The cerebral and systemic hemodynamic and metabolic effects of desflurane-induced hypotension in dogs. *ANESTHESIOLOGY* 1991; 74:513-8
- Stebel S, Lam AM, Matta B, Mayberg TS, Aaslid R, Newell DW: Dynamic and static cerebral autoregulation during isoflurane, desflurane, and propofol anesthesia. *ANESTHESIOLOGY* 1995; 83:66-76
- Talke P, Caldwell J, Dodson B, Richardson CA: Desflurane and isoflurane increase lumbar cerebrospinal fluid pressure in normocapnic patients undergoing transphenoidal hypophysectomy. *ANESTHESIOLOGY* 1996; 85:999-1004
- Artru AA, Powers KM: Furosemide decreases cerebrospinal fluid formation during desflurane anesthesia in rabbits. *J Neurosurg Anesth* 1997; 9:166-74
